# Supplementary material for: 2′-Deoxyribonucleoside 5′-triphosphates bearing 4-phenyl and 4-pyrimidinyl imidazoles as DNA polymerase substrates
Source: Royal Society of Chemistry journal article supplement (doi:10.1039/c8ob02464b), 2018-12-04

## Supporting Information

### Synthesis and DNA polymerase recognition of 2'-deoxyribonucleoside triphosphates bearing 4-phenyl and 4-pyrimidinyl imidazoles as nucleobases

Sophie Vichier-Guerre, Laurence Dugué and Sylvie Pochet\*

Unité de Chimie et Biocatalyse, Institut Pasteur, CNRS, UMR3523,  
28, rue du Dr Roux, 75724 Paris Cedex 15

|                    |            |
|--------------------|------------|
| <b>Table S1</b>    | <b>p 2</b> |
| <b>Figure S1</b>   | <b>p 2</b> |
| <b>Figure S2</b>   | <b>p 3</b> |
| <b>Figure S3</b>   | <b>p 3</b> |
| <b>Figure S4</b>   | <b>p 4</b> |
| <b>NMR spectra</b> | <b>p 5</b> |

**Table S1.** % Conversion of **9** into phosphorylated products **10** and **11** as a function of temperature/time

| Temperature    | POCl <sub>3</sub><br>(equiv) | after 30 min |             |             | after 60 min |             |             |
|----------------|------------------------------|--------------|-------------|-------------|--------------|-------------|-------------|
|                |                              | % <b>9</b>   | % <b>10</b> | % <b>11</b> | % <b>9</b>   | % <b>10</b> | % <b>11</b> |
| 2°C (ice bath) | 1.20                         | 1            | 65          | 34          | ND           | ND          | ND          |
| -5°C           | 1.15                         | ND           | ND          | ND          | 0            | 78          | 22          |
| -5°C           | 1.05                         | 12           | 82          | 6           | 9            | 84          | 7           |
| -10°C          | 1.15                         | 1            | 86          | 12          | 0            | 82          | 18          |
| -10°C          | 1.05                         | 15           | 80          | 5           | 8            | 85          | 7           |

*Reaction conditions:* (**9**) (0.1 mmol) and proton sponge (1.2 equiv) in PO(OMe)<sub>3</sub> (0.9 mL) was stirred for 10 min at the indicated temperature, then POCl<sub>3</sub> (as indicated) in PO(OMe)<sub>3</sub> (0.1 mL) was added dropwise. Aliquots of the reaction mixture were hydrolysed after 30 and 60 min and analysed by HPLC (detection at 230 nm).

**Figure S1.** HPLC monitoring at 230 nm of phosphorylation reaction

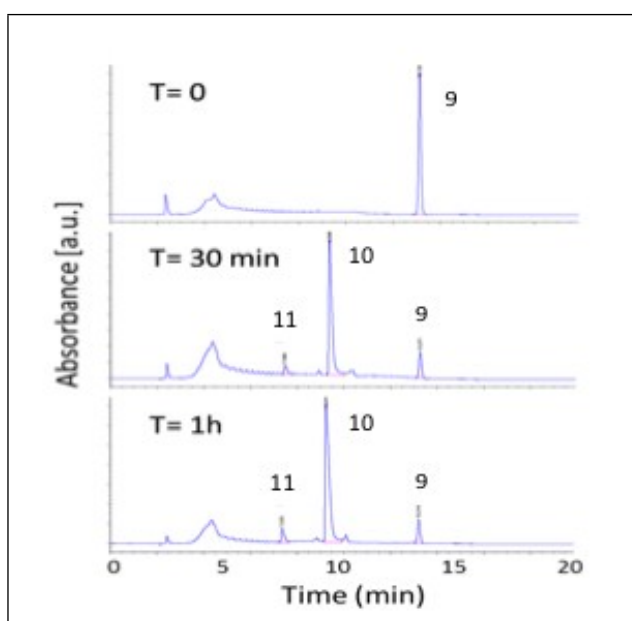

Reaction conditions: 1.05 equiv POCl<sub>3</sub> at -5°C (Table S1); Analytical C18 column, 0-20% linear gradient of acetonitrile in 40 mM TEAA buffer over 20 min. Retention times ( $t_R$ ): 7.37 min for **11**, 9.24 min for **10**, 13.20 min for **9**.

## Oligodeoxynucleotide sequences used in PEX experiments

| Name | Sequence                             |
|------|--------------------------------------|
| P1   | 5'-ATTGGTAGCACGGTCAGTTCGGAGT-3'      |
| T5   | 3'-TAACCATCGTGCCAGTCAAGCCTCAAAAAA-5' |
| P3   | 5'-CAGGAAACAGCTATGAC-3'              |
| T6   | 3'-GTCCTTTGTCGATACTGTTTTT-5'         |

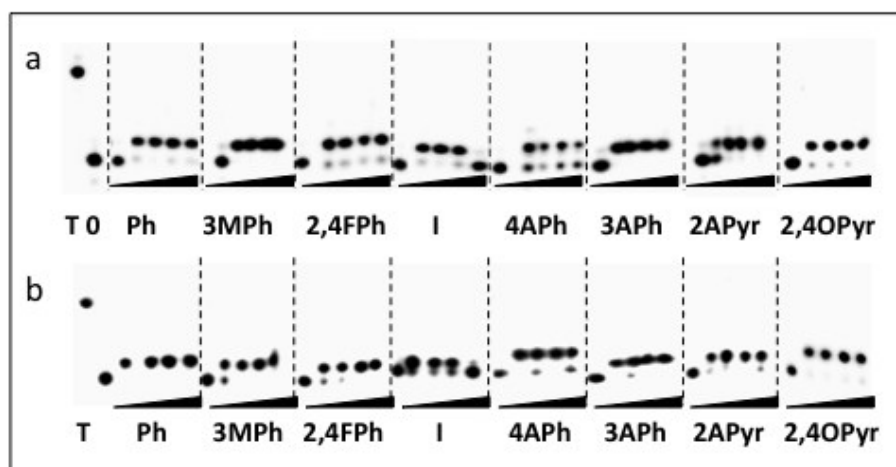

**Figure S2.** PAGE analysis of primer extension experiments with KF (exo-) using template T5 after incorporation of an analogue (0, 10, 25, 100, 250  $\mu\text{M}$  as indicated by the arrow) or dTTP (10  $\mu\text{M}$ ) in the absence or presence of  $\text{Mn}^{2+}$  ions (0.25 mM) (Panel a or b, respectively).

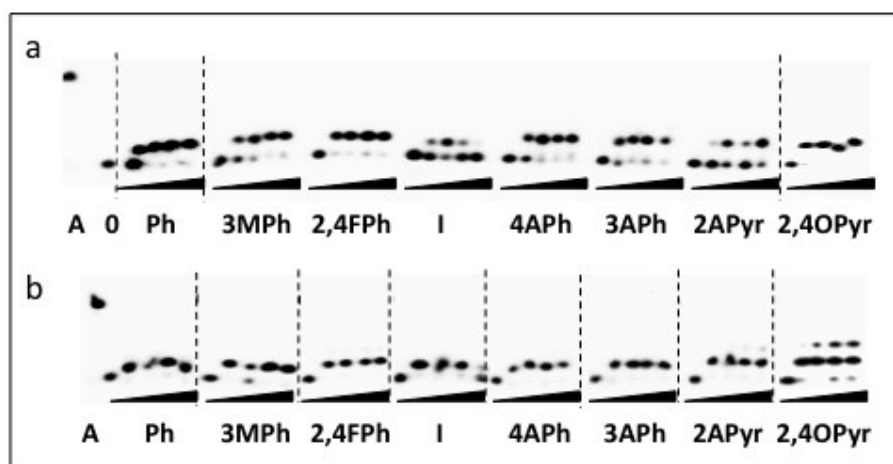

**Figure S3.** PAGE analysis of primer extension experiments with KF (exo-) using template T6 after incorporation of an analogue (0, 10, 25, 100, 250  $\mu\text{M}$   $\mu\text{M}$  as indicated by the arrow) or dATP (10  $\mu\text{M}$ ) in the absence or presence of  $\text{Mn}^+$  ions (0.25 mM) (Panel a or b, respectively).

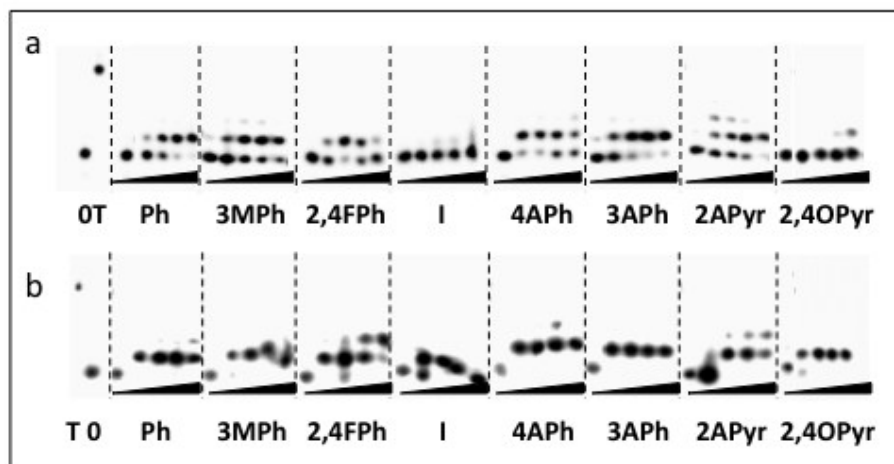

**Figure S4.** PAGE analysis of primer extension experiments with Vent (exo-) using template T5 after incorporation of an analogue (0, 10, 25, 100, 250  $\mu\text{M}$   $\mu\text{M}$  as indicated by the arrow) or dTTP (10  $\mu\text{M}$ , noted T)

in the absence or presence of  $\text{Mn}^{2+}$  ions (0.25 mM) (Panel a or b, respectively).

# 1-(2-Deoxy-β-D-ribofuranosyl)-4-iodo-1*H*-imidazole-5'-*O*-monophosphate (10)

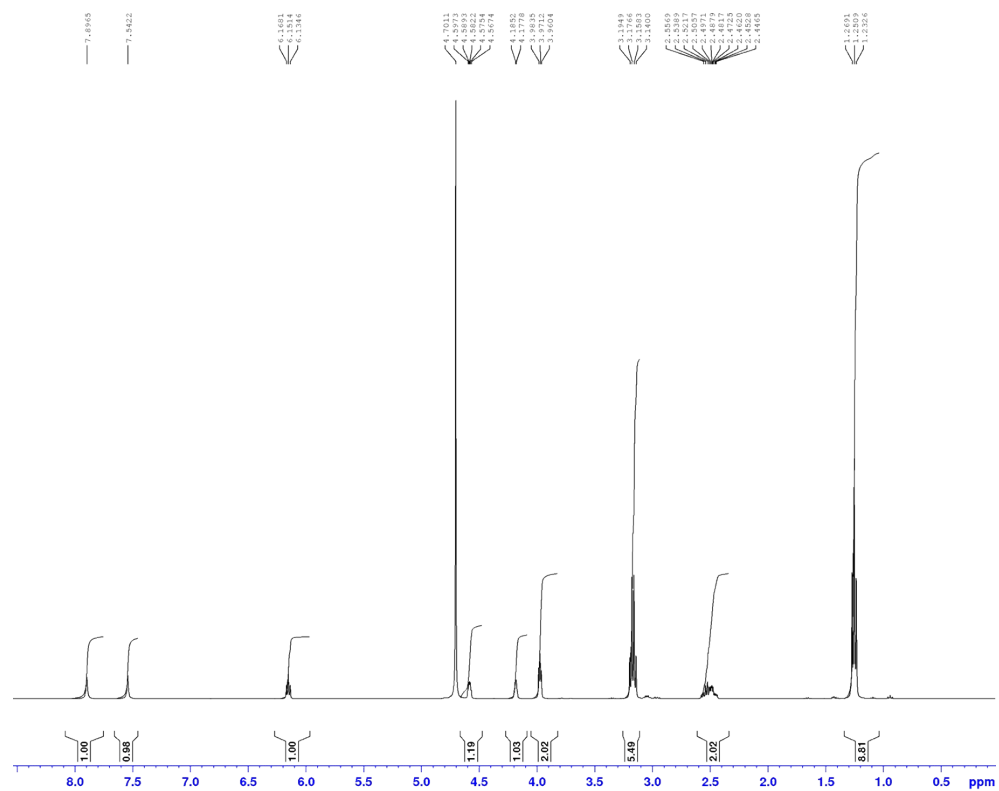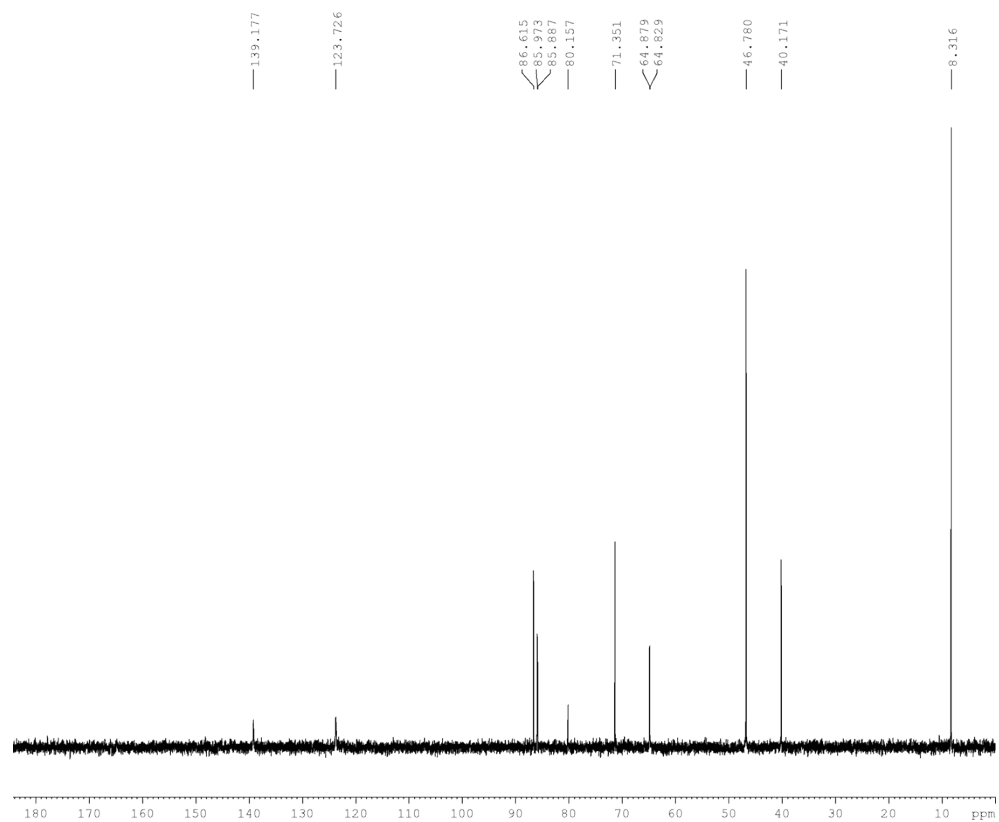

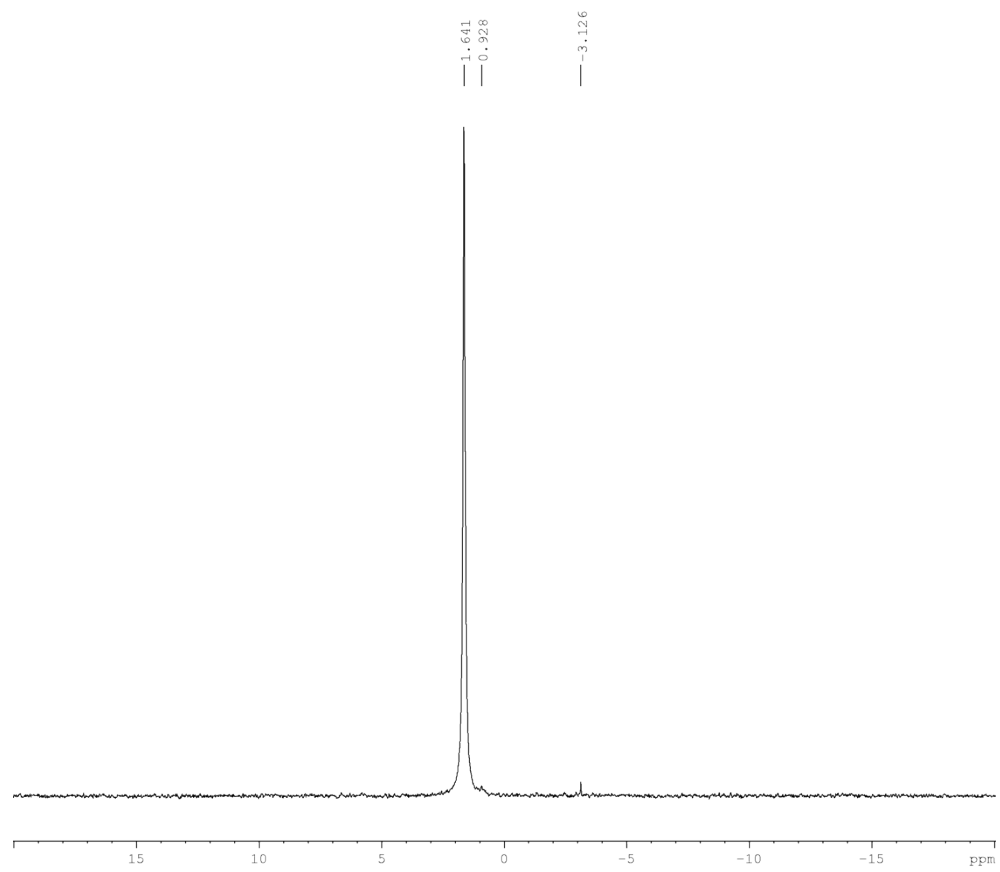

# 1-(2-Deoxy-β-D-ribofuranosyl)-4-iodo-1H-imidazole-3', 5'-O-diphosphate (11)

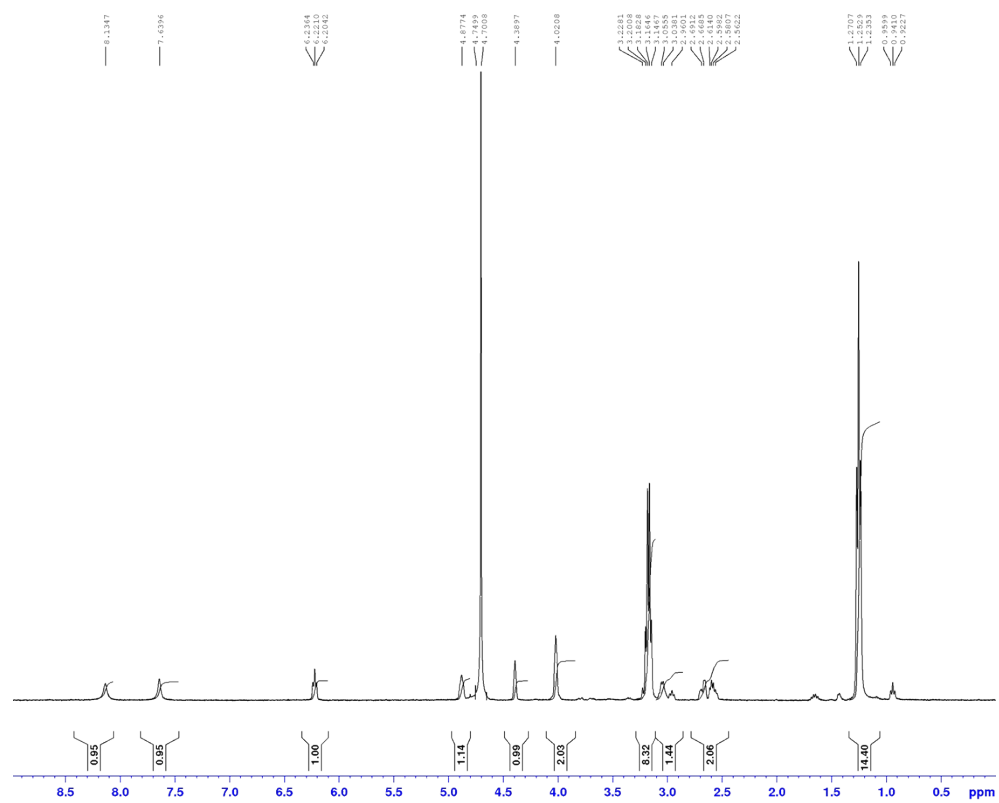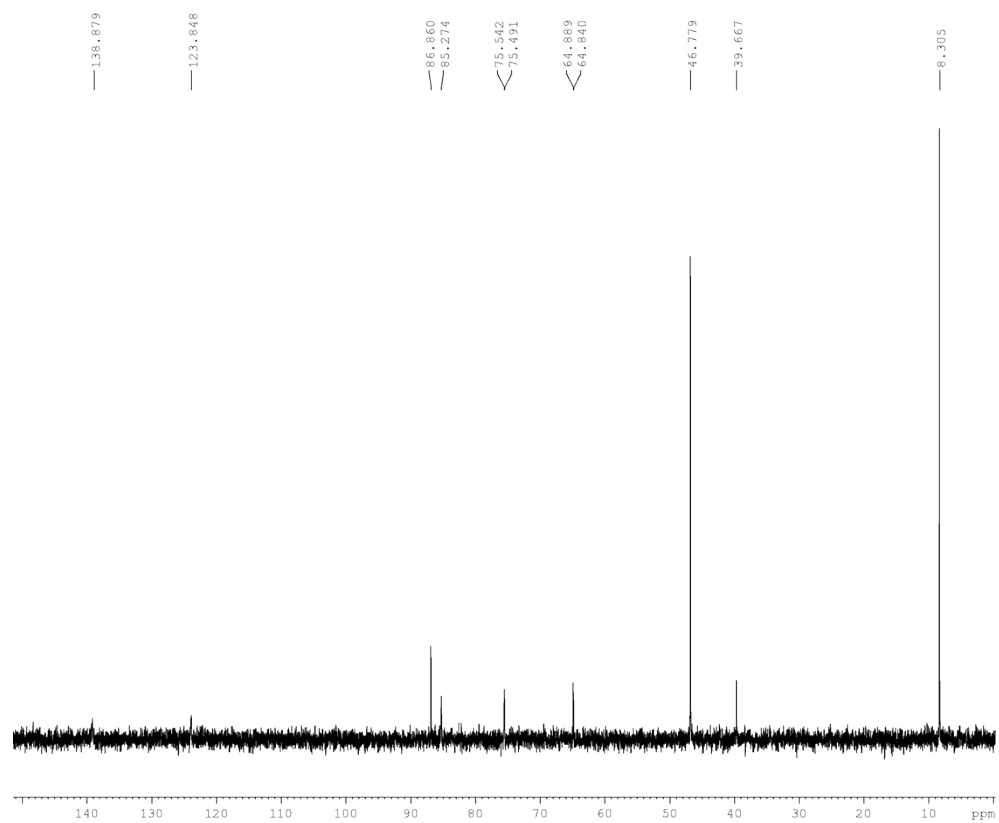

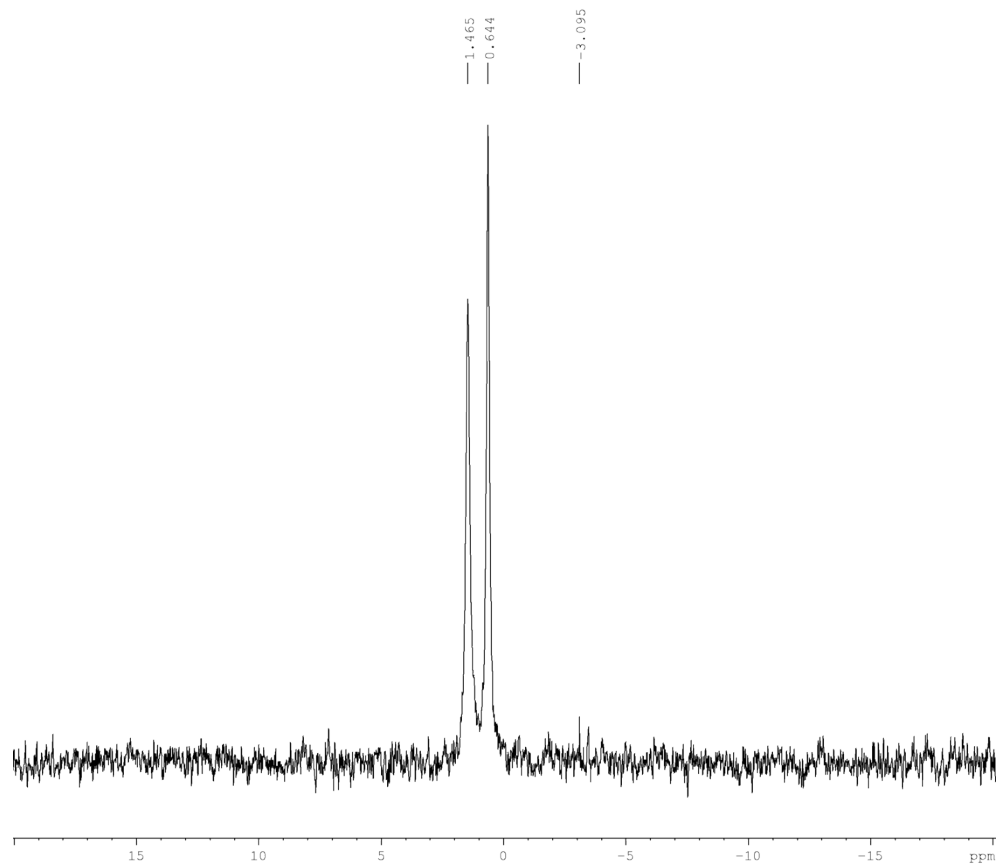



# Compound 1 (I)

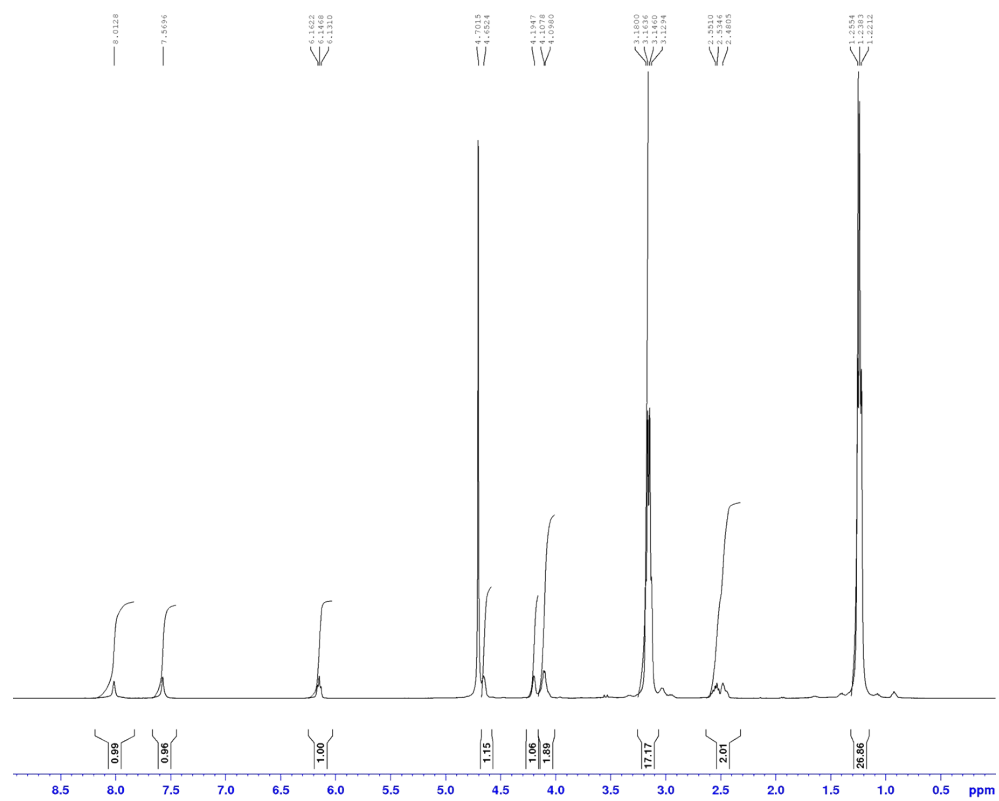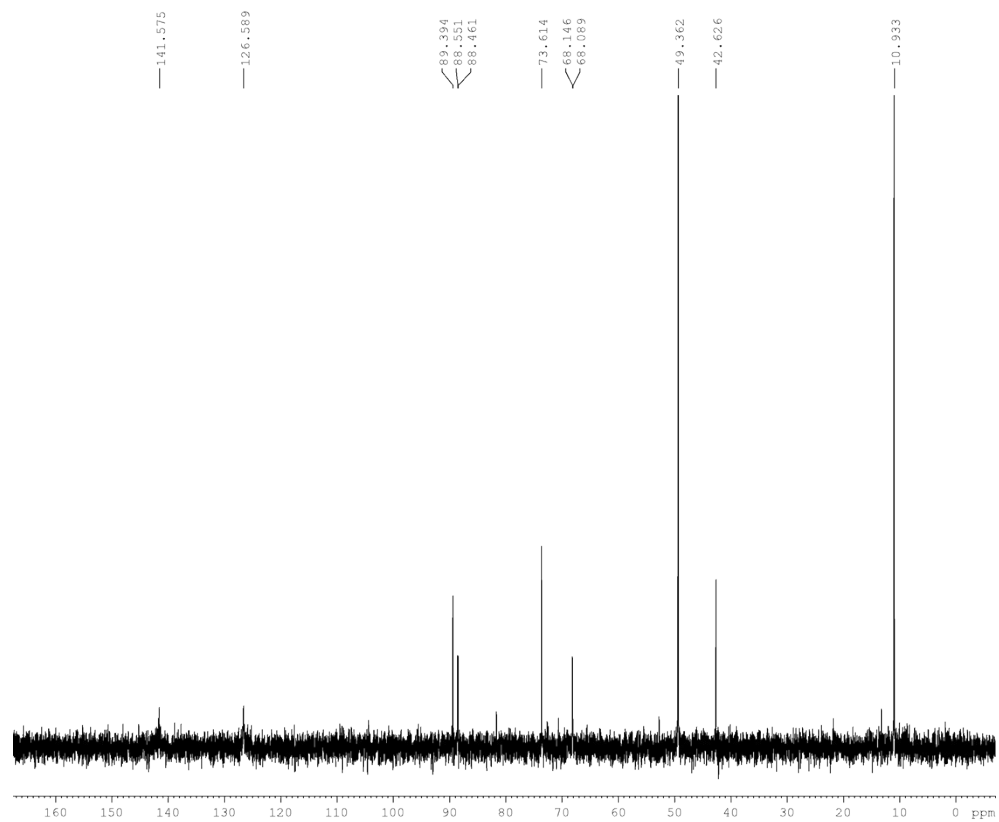

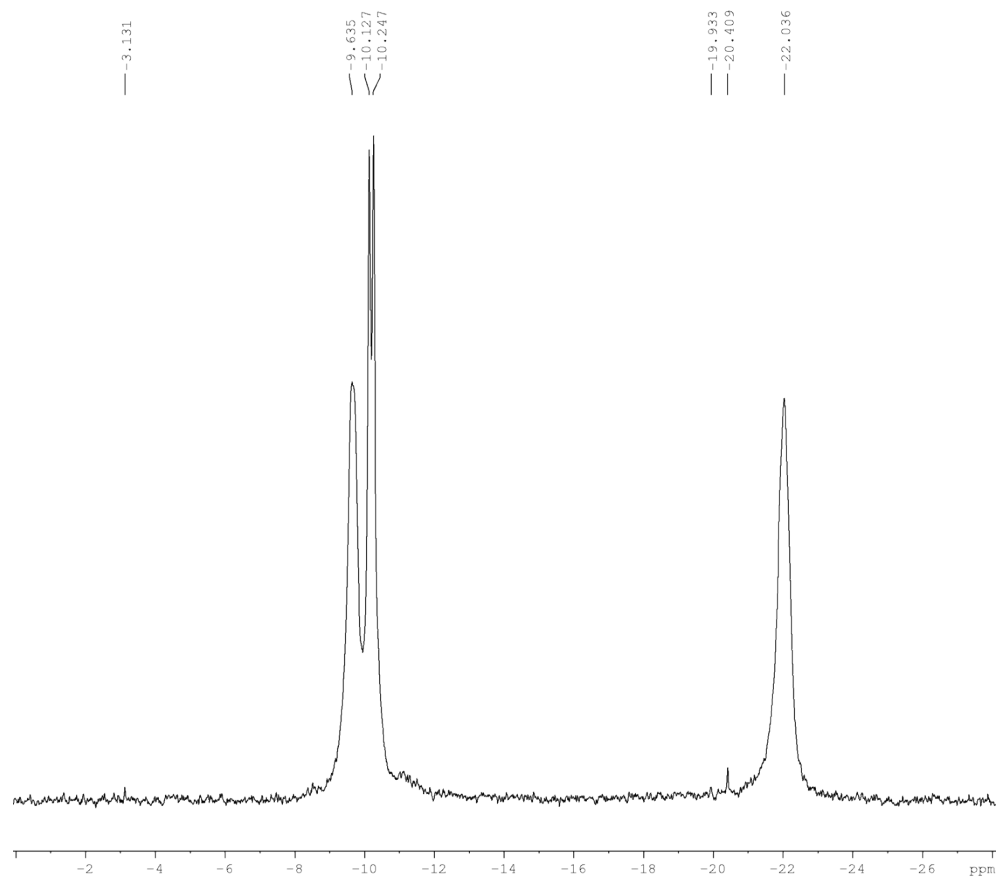

# Compound 2 (Ph)

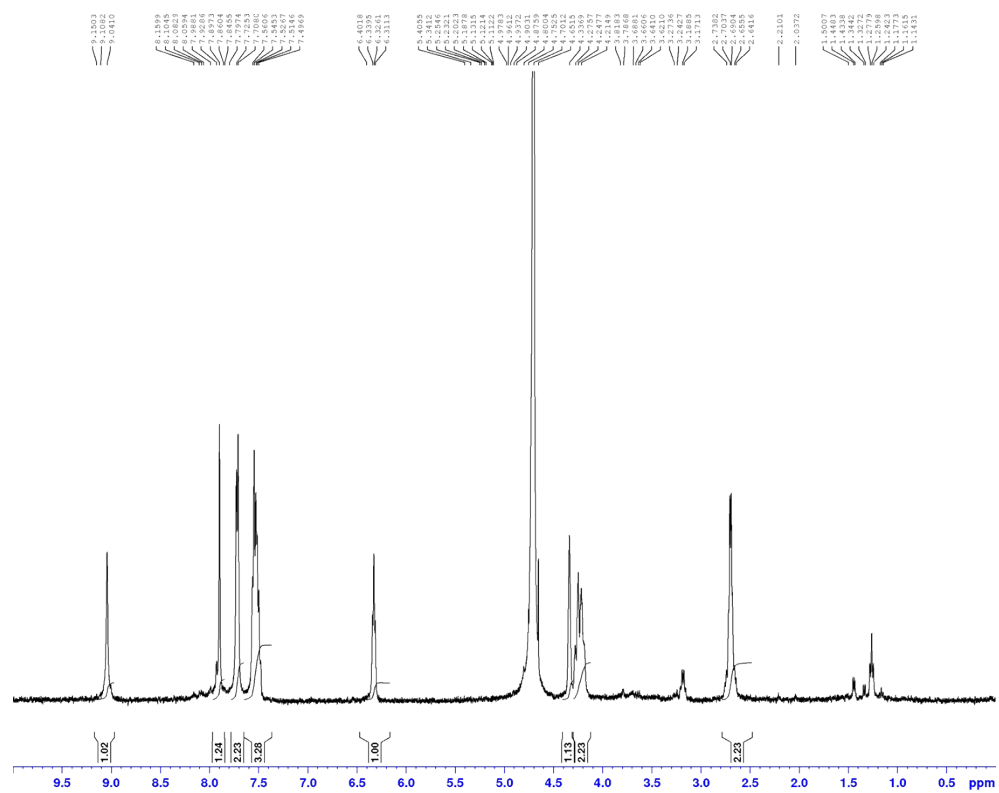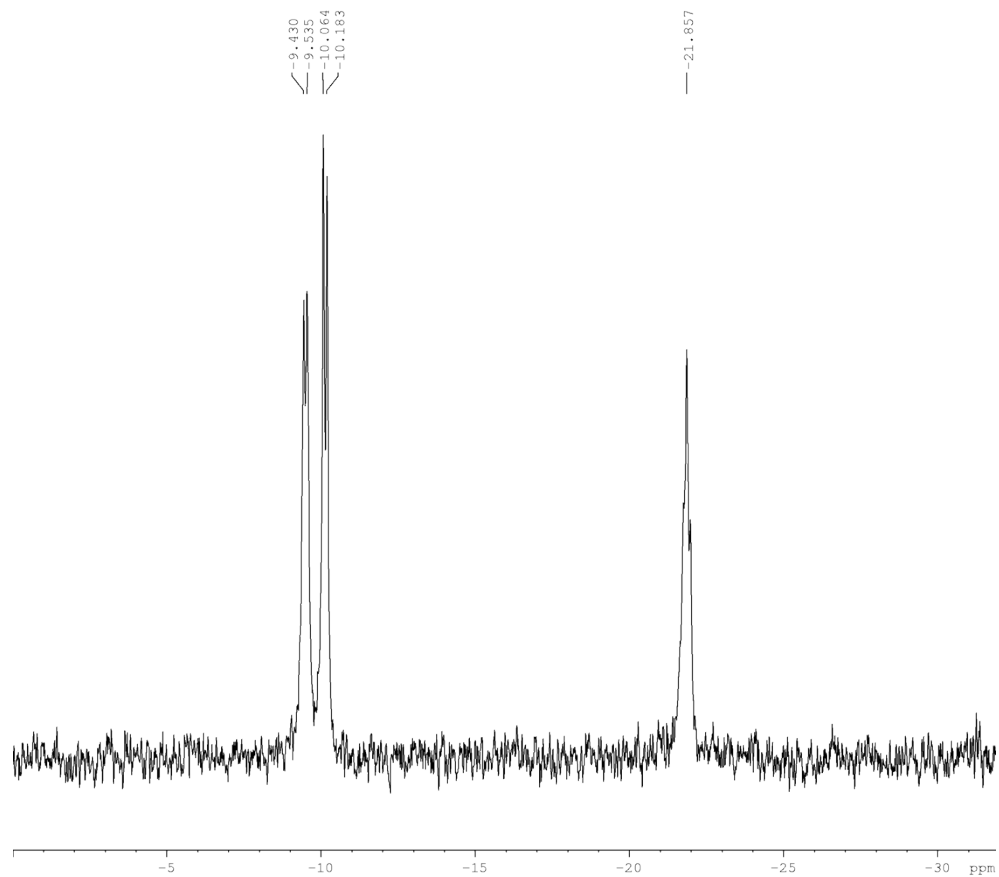

# Compound 3 (3MPH)

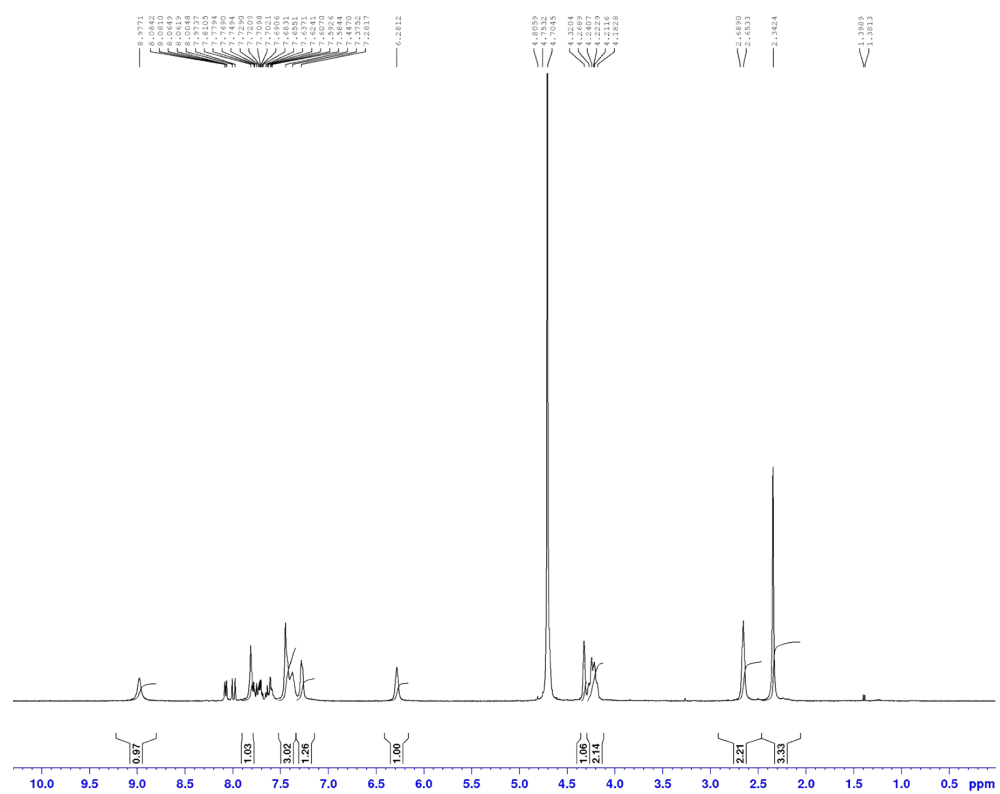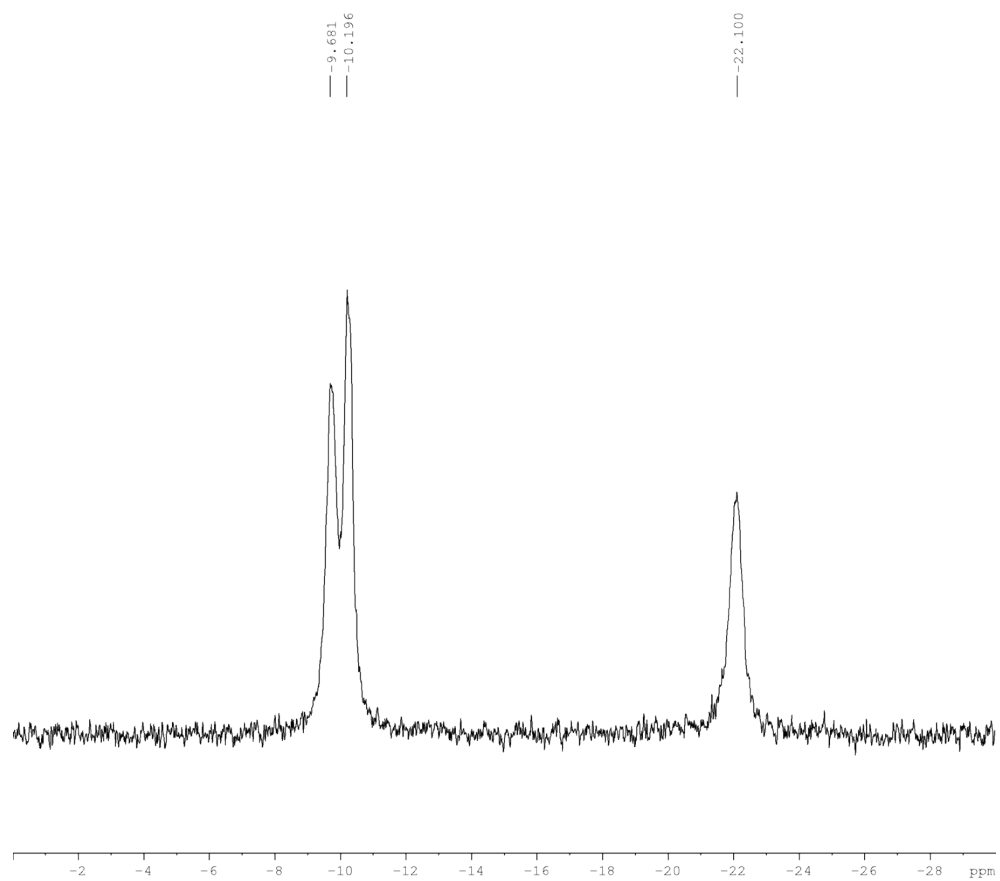

# Compound 4 (3APh)

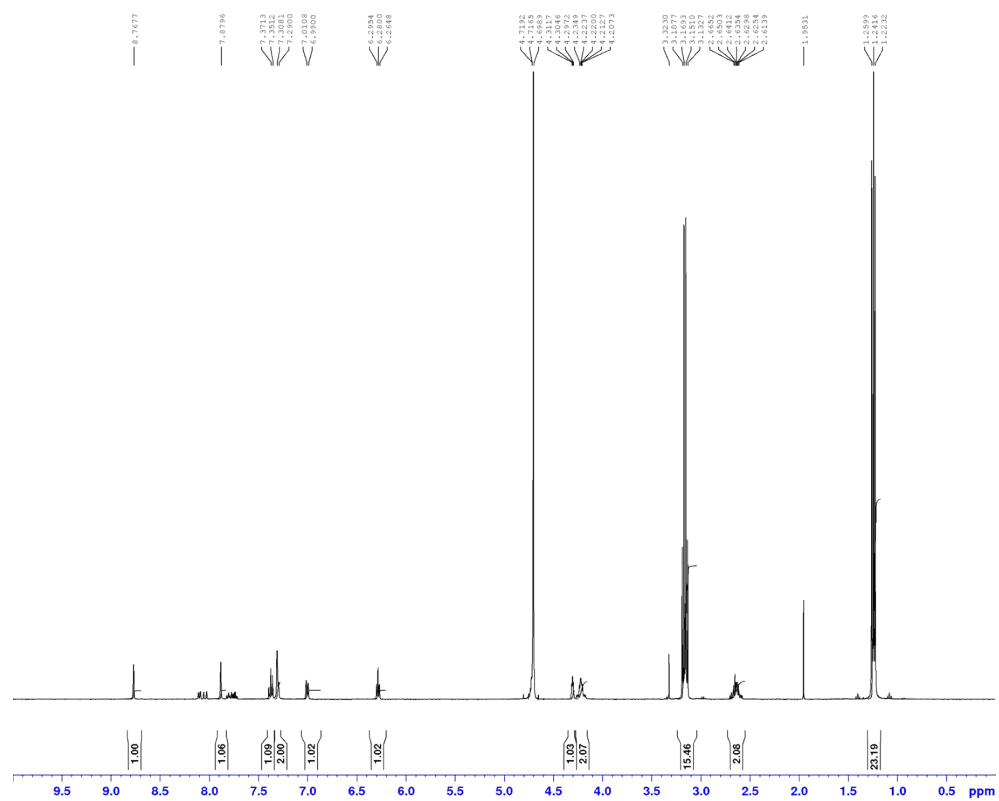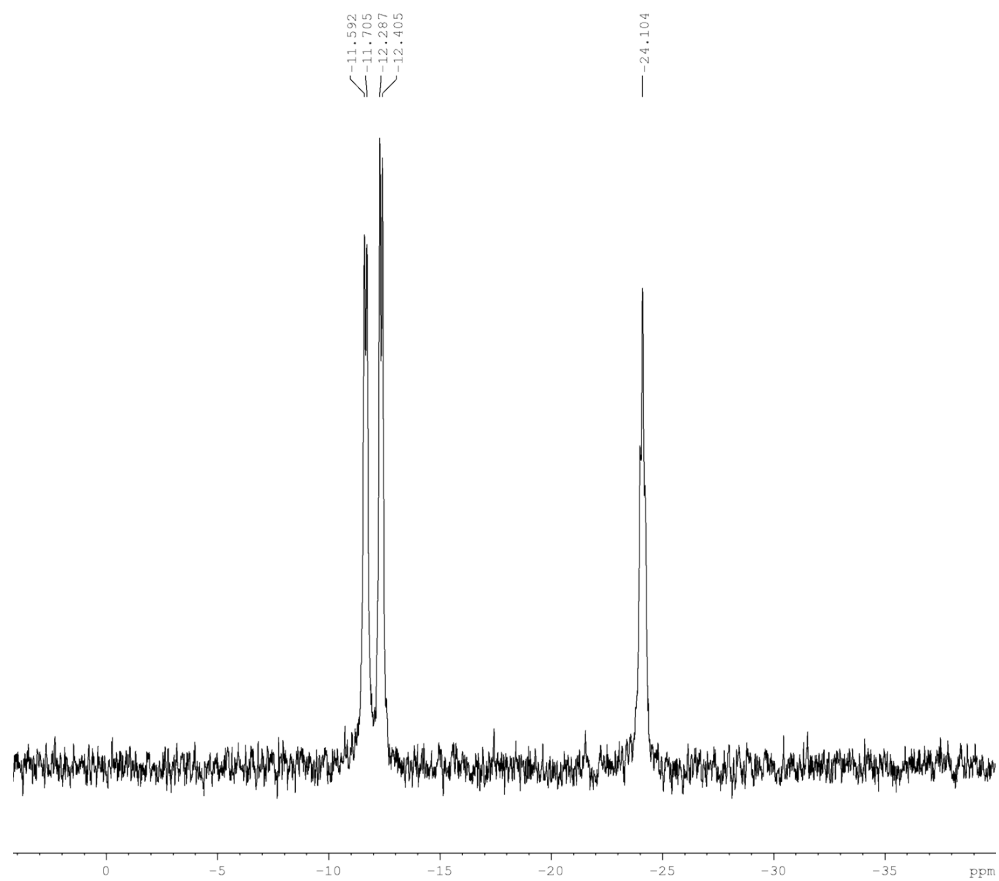

# Compound 5 (4APh)

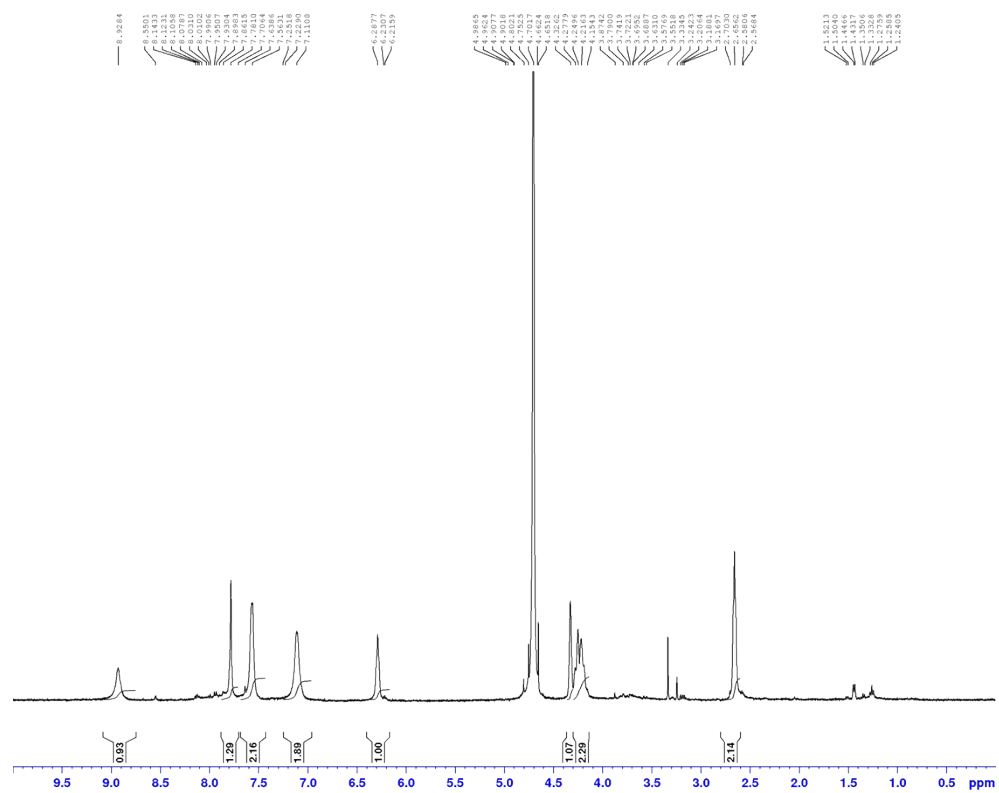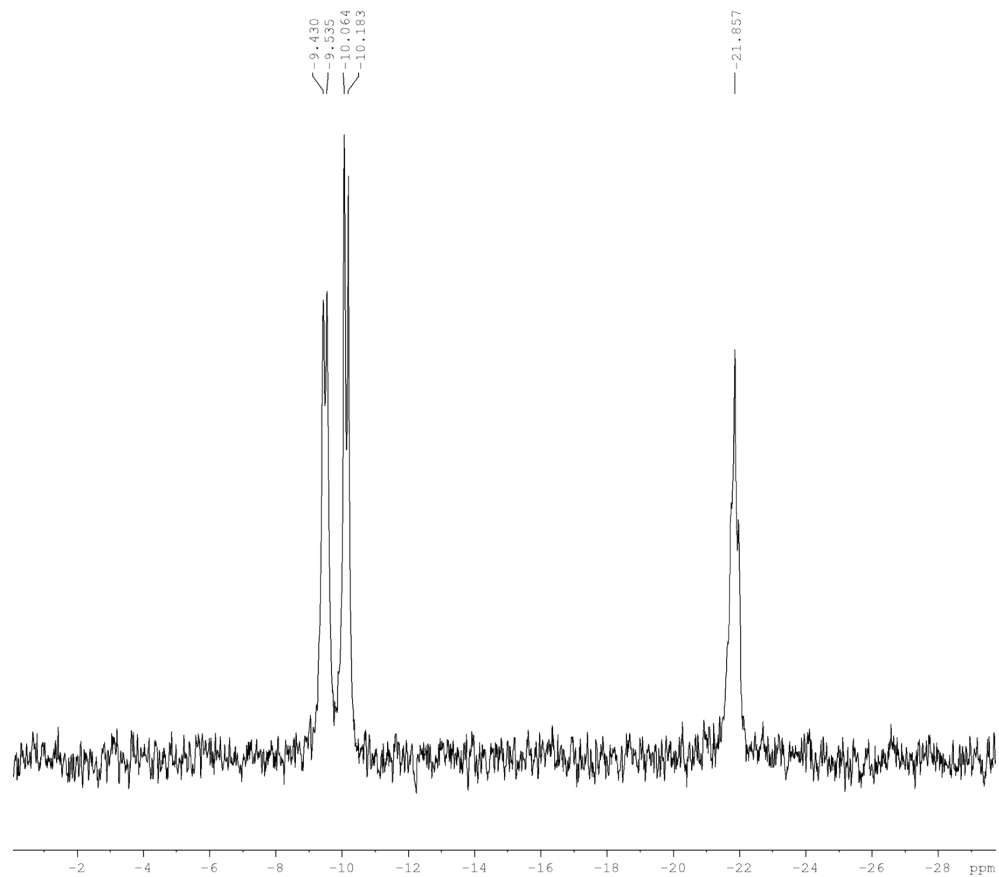

# Compound 6 (2APyr)

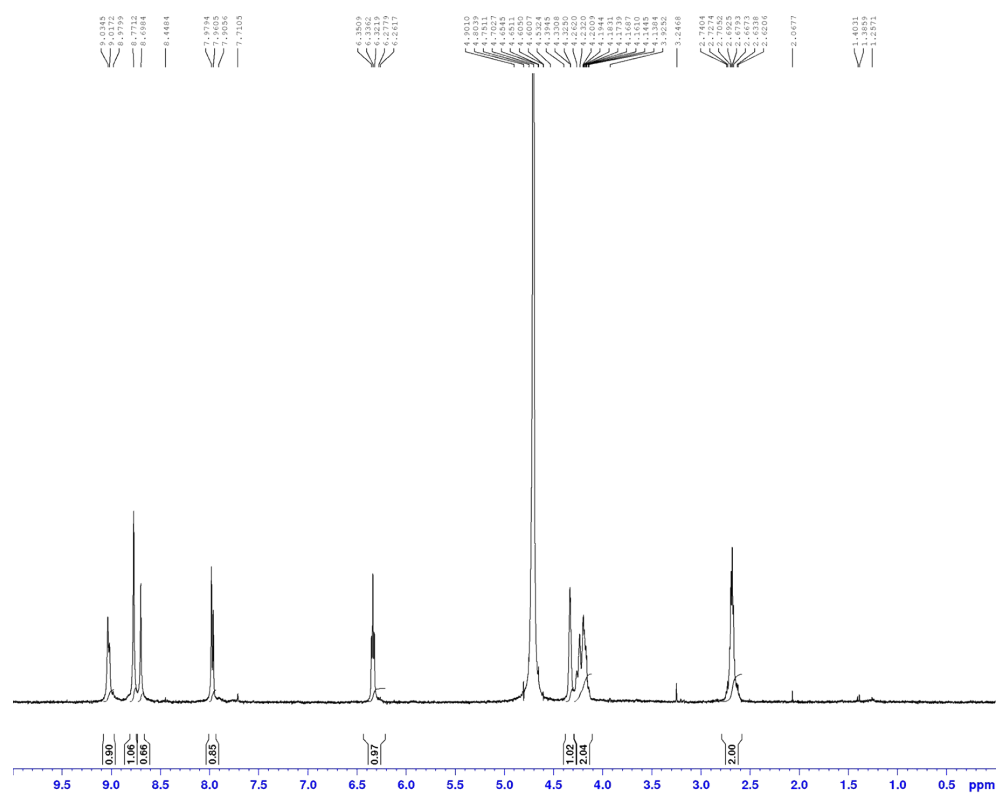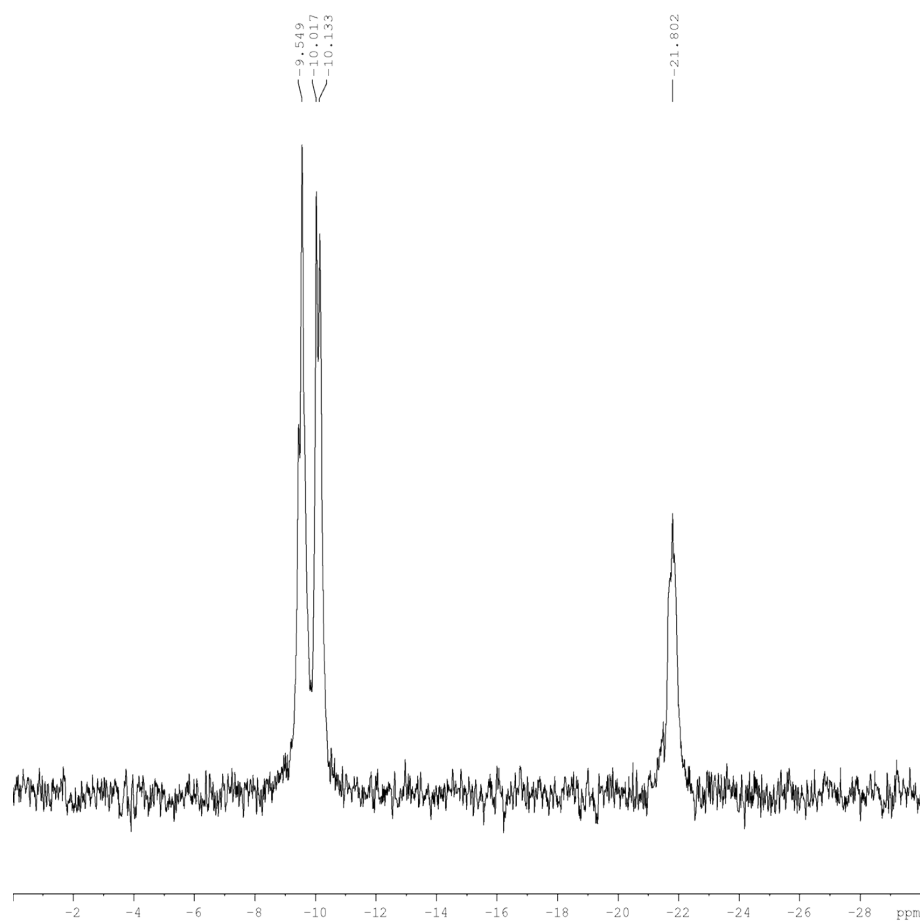

# Compound 7 (2,4FPh)

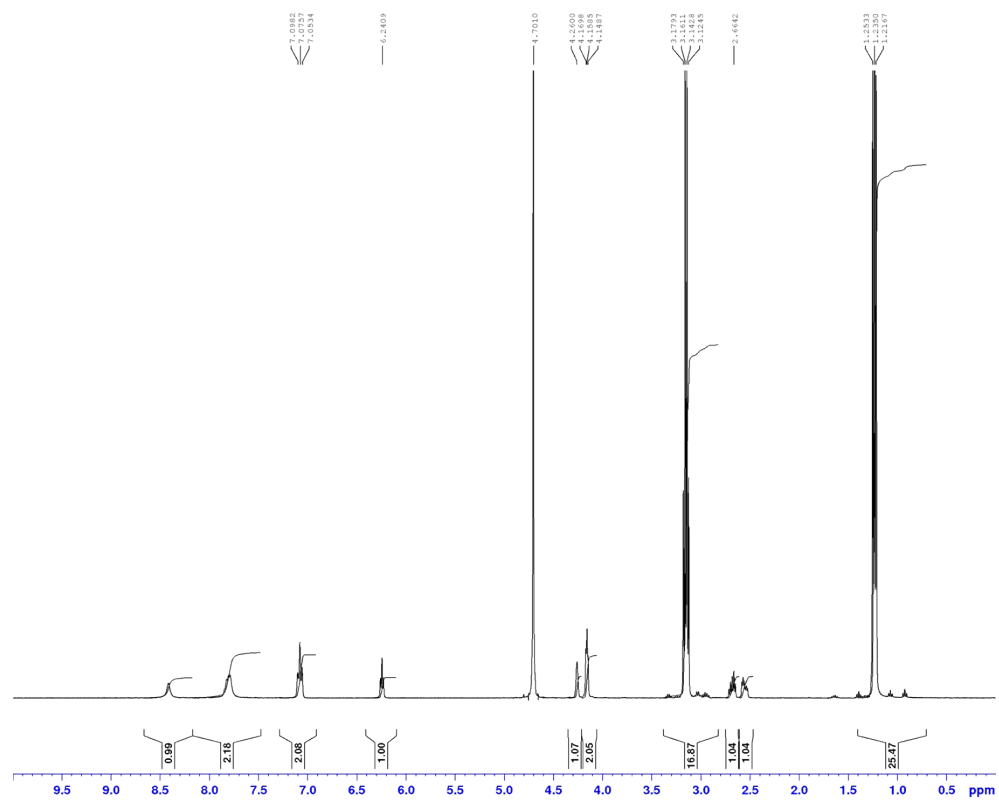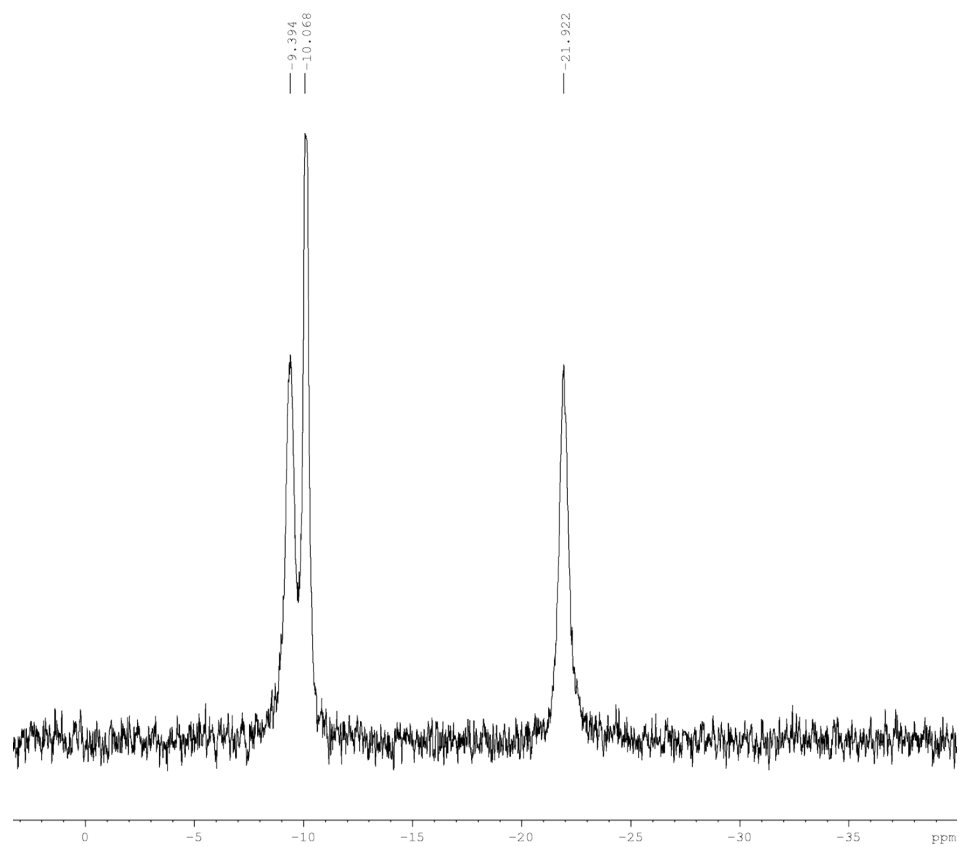



# Compound 8 (2,4OPyr)

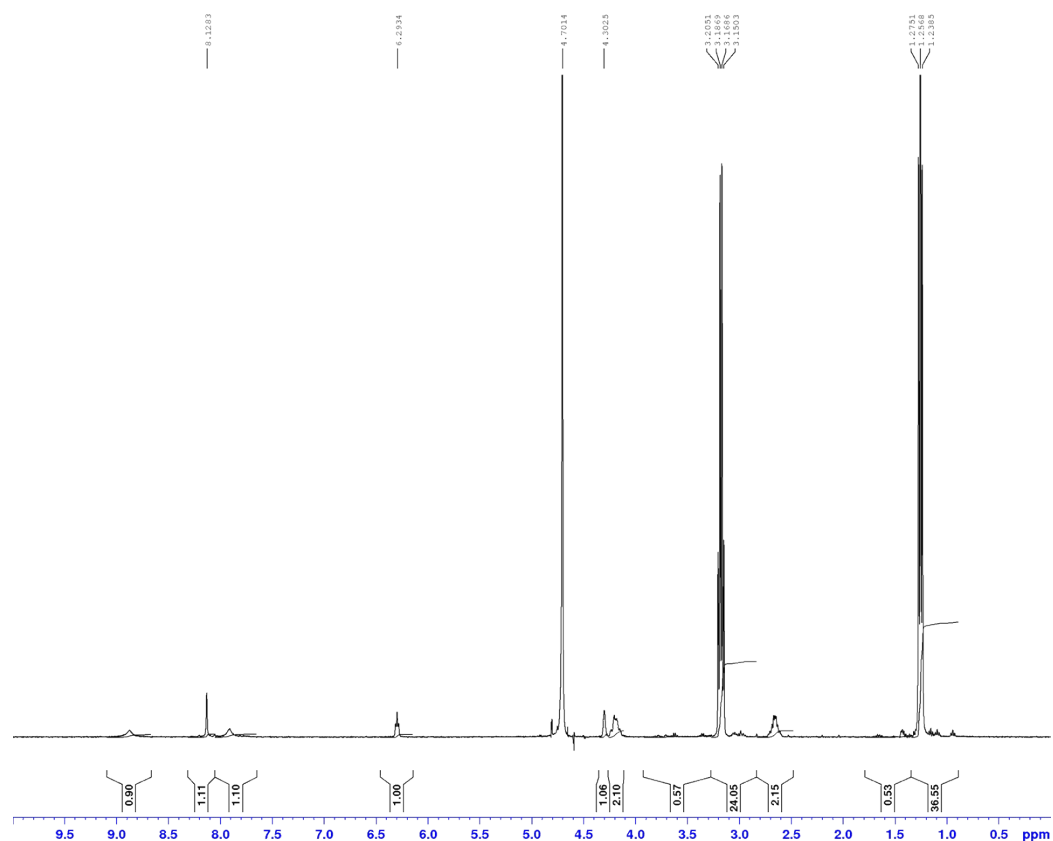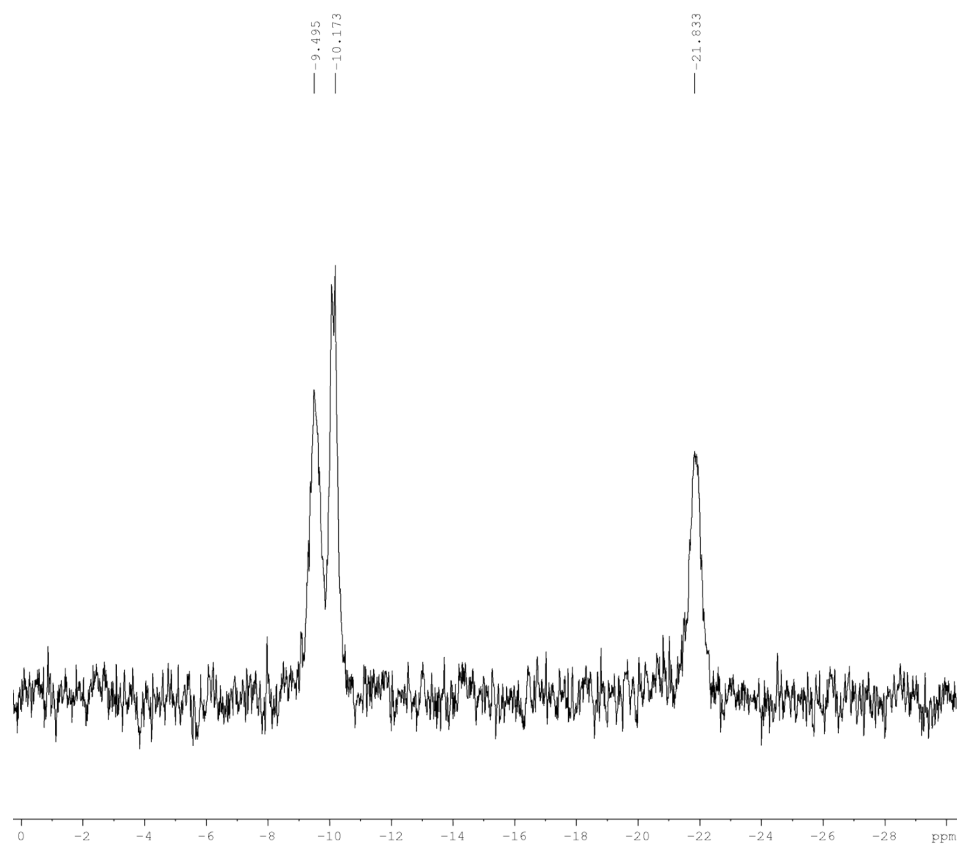

Supplement: c8ob02464b1.pdf [file c8ob02464b1.pdf]
